# Supplementary material for: Quantitative high-resolution observations of soil water dynamics in a complicated architecture using time-lapse ground-penetrating radar
Source: Copernicus journal article supplement (doi:10.5194/hess-19-1125-2015), 2015-03-02
Supplement: Supplementary file 1 [file hess-19-1125-2015-supplement.zip]

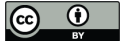

## *Supplement of*

# **Quantitative high-resolution observations of soil water dynamics in a complicated architecture using time-lapse ground-penetrating radar**

**P. Klenk et al.**

*Correspondence to:* P. Klenk ([patrick.klenk@iup.uni-heidelberg.de](mailto:patrick.klenk@iup.uni-heidelberg.de))

- [hess-19-1125-2015-supplement-cover-letter.pdf](#)
- [Klenketal\\_HESS+2015\\_Exp1\\_movie.mp4](#)
- [Klenketal\\_HESS+2015\\_Exp2\\_movie.mp4](#)
- [\\_\\_MACOSX](#)
  - [.\\_Klenketal\\_HESS+2015\\_Exp1\\_movie.mp4](#)
  - [.\\_Klenketal\\_HESS+2015\\_Exp2\\_movie.mp4](#)
